# Supplementary material for: Investigation of the photocatalytic potential of C/N-co-doped ZnO nanorods produced via a mechano-thermal process
Source: Royal Society of Chemistry journal article supplement (doi:10.1039/d4na00890a), 2025-01-01
Supplement: d4na00890a1.pdf [file d4na00890a1.pdf]

## Investigation of Photocatalytic Potential of C/N-Co-doped ZnO Nanorods Produced via Mechano-thermally Intervened Process

Parmeshwar Lal Meena, Ajay Kumar Surela, Lata Kumari Chhachhia, Jugmohan Meena,  
Rohitash Meena

Department of Chemistry, University of Rajasthan, Jaipur-302004 (India)

Email: parmashwar1978@gmail.com

### Supplementary Material

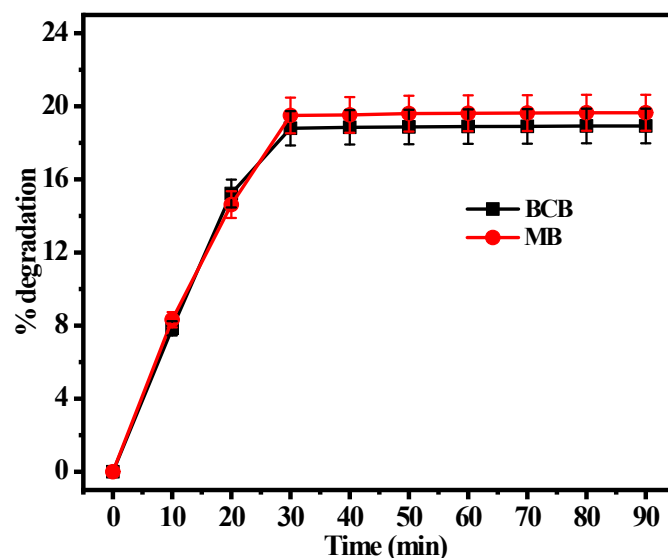

Fig.1S Degradation of BCB and MB in presence of C/N-co-doped ZnO under dark

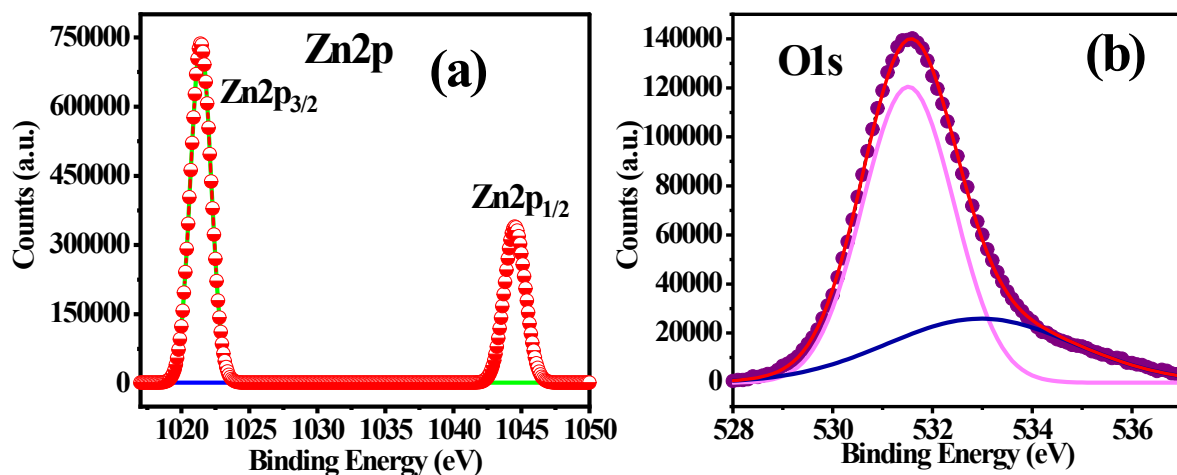

Fig.2S (a) Zn2p (b) O1s XPS spectra for pure ZnO

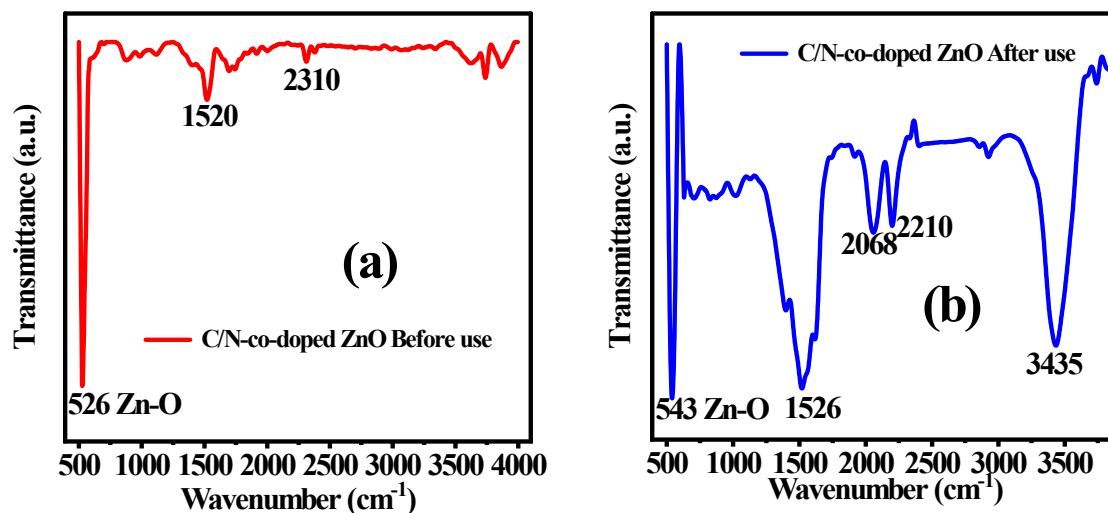

**Fig. 3S** FTIR for C/N-co-doped ZnO before use for photocatalytic degradation and after use in photocatalysis

The comparison in FTIR spectra of C/N-co-doped ZnO before use for photocatalytic degradation and after use in photocatalysis as shown in Fig.3S indicating that substantial structural changes due to binding intermediate products of dye pollutants produced during photocatalytic degradation process. Peak related to Zn-O and other groups have been shifted at higher wavenumber, and some new peaks at 2068 and 2210 cm<sup>-1</sup> and 3435 cm<sup>-1</sup> emerged.
